# Supplementary material for: Microglia Responses in Acute and Chronic Neurological Diseases: What Microglia-Specific Transcriptomic Studies Taught (and did Not Teach) Us
Source: Front Aging Neurosci. 2017 Jul 21;9:227. doi: 10.3389/fnagi.2017.00227 (PMC5519576; doi:10.3389/fnagi.2017.00227)
Supplement: Supplementary file 1 [file Table_1.xlsx]

## Sheet: Sub-table 1
Table 1: : Use of microglia-specific gene expression strategies in healthy and neuropathological conditions
1st Author	Year	Species	Strain	Isolation Techniques	Microglia source	Isolation techniques	Transcriptome assessment	Inflammatory conditions
Physiological conditions
Bedard et al.	2007	Mouse		FCS	Adult Brain	CD11b+/CD45low	Affymetrix Mouse Genome 430 2.0 arrays	-
Gauthier et al.	2012	Mouse		FCS	Adult brain	CD11b+/CD45low	Affymetrix Mouse Gene 1.0 ST arrays	-
Parakalan	2012	Rat		LCM	Developping brain (P5 to P30),Corpus callosum	Lectin labelling	Affymetrix Rat Genome 230 2.0 Array	-
Beutner et al.	2013	Mouse		FCS	Primary cultures, embryonic stem cell derived & Adult Brain	CD11b+/CD45low	Illumina MouseWG-6 v2 Expression BeadChip	-
Butovsky et al.	2014	Mouse		FCS	Adult brain	CD11b+/CD45low/F4/80low	Affymetrix Exon1 genearray	-
Zhang et al.	2014	Mouse		O	P7 Cerebral cortex	CD45 immunopanning	RNASeq (Illumina HiSeq 2000)	-
Hickman et al.	2013	Mouse		FCS	Adult Brain	CD11b+/CD45low	DRS (Helicos)	(Aging)
Orre et al.	2014a	Mouse		FCS	Adult Cerebral cortex	CD11b+/CD45low	Agilent Mouse GE 4x44k V2 microarrays	(Aging)
Solga et al.	2015	Mouse		FCS, LCM	Adult Brain stem	FCS: Cd11b+/Cd45low; GFP in CX3CR1+/egfp mice LCM: GFP in CX3CR1+/egfp mice	RNAseq (Illumina HiSeq 2000)	-
Grabert et al.	2016	Mouse		B	Adult specific Brain regions	CD11b magnetic beads separation	Affymetrix HT MG-430PM array plate	-
Matcovitch-Natan et al.	2016	Mouse		FCS	Developping and Adult brain	CD11b+/CD45low; GFP in CX3CR1+/egfp mice	RNAseq and Single cell RNAseq (Illumina NextSeq 500 / HiSeq)	-
Bennett et al.	2016	Mouse		FCS	Developping Adult Brain, Tmem119+	Tmem119+	RNAseq (NextSeq Illumina)	-
Traumatic central nervous system injuries
Zhu et al.	2017	Mouse		FCS	Spinal cord (T8)	Ribo Tag (hemagglutinin)	RNAseq (Illumina HiSeq 2000)	Spinal cord injury (contusion)
Noristani et al.	2017	Mouse		FCS	Spinal cord (T9)	GFP in CX3CR1+/egfp mice	RNAseq (Illumina HiSeq 2500)	Spinal cord injury (Transection & Hemisection / 72 h; 1 week; 2 weeks)
Jeong et al.	2016	Mouse		O	Adult spinal cord (Laminae I/II)	GFP in CX3CR1+/egfp mice , manual sorting	Affymetrix Mouse Gene 1.0 ST arrays	Peripheral nerve injury 1 and 7 days post-injury
ALS
Chiu et al.	2013	Mouse		FCS	Adult Spinal cord	CD11b+ magnetic beads separation	RNAseq (Illumina HiSeq 2000)	SODG93A mice 65 days / 100 days / End stage
Noristani et al.	2015	Mouse		FCS	Adult lumbar spinal cord	CD11b+	Affymetrix GeneChip® MOE 430 2.0	SODG93A mice 90 days
Alzheimer Disease
Orre et al.	2014b	Mouse	Not specified	FCS	Adult Cerebral cortex	CD11b+/CD45low	Agilent Mouse GE 4x44k V2 microarrays	APP/PS1 15-18 month old
Wang et al.	2015	Mouse	Not specified	FCS	Adult hippocampi and cerebral cortices	CD11b+/CD45low	Affymetrix Mouse Gene 1.0 ST arrays	5x FAD 8.5 month-old
Srinivasan et al.	2016	Mouse	Females (mainly) C57/BL6	FCS	Cortices + Hippocampi	Cd11b+	RNAseq (Illumina HiSeq 2500)	PS2APP 7 & 13 months-old
Multiple Sclerosis
Starossom et al.	2011	Mouse		FCS	Adult Subventricular zone tissue	CD11b+/CD45low	Affymetrix Mouse Genome 430 2.0 arrays	EAE model
Olah et al.	2012	Mouse		FCS	Corpora callosa	CD11b+/CD45low	Illumina MouseRef-8 v2.0 Expression Bead-chips	MS model
Lewis et al.	2014	Mouse		FCS	Adult Brain&Spinal-Cord	Cd11b+/Cd45low/Ly6C-/ Cd44-	RNASeq (Illumina HiSeq 2000)	EAE model Stage 0 and 3
Periheral Immune Challenge
Chiu et al.	2013	Mouse	C57BL/6 unspecified gender	FCS	Adult Spinal cord	CD11b+ magnetic beads separation	RNAseq (Illumina HiSeq 2000)	LPS O55:B55 E.Coli 5 mg/kg - 48h
Holtman et al.	2015	Mouse	C57BL/6 unspecified gender	FCS	Adult Cerebral cortex	CD11b+/CD45low	Illumina MouseRef8	LPS 10 mg/kg - 4h
Bennett et al.	2016	Mouse	C57BL/6 P60 Males & Females	FCS	Adult Brain, Tmem119+	Tmem119+	RNAseq (NextSeq Illumina)	LPS O55:B55 E.Coli 5 mg/kg - 24h
Srinivasan et al.	2016	Mouse	C57BL6/J Males	FCS	Cortices + Hippocampi	Cd11b+	RNAseq (Illumina HiSeq 2500)	LPS 0111:B4 E. Coli 10 mg/kg - 24h
Gonzales-Penna et al.	2016	Mouse	C57Bl/6J 22-weeks-old Males	B	Whole brains	Cd11b magnetic beads separation	RNAseq (Illumina HiSeq 2000)	BCG challenge 7 days post
Gliomas
Szulzewsky et al.	2015	Mouse		B	Adult Telencephalon	CD11b magnetic beads separation	Affymetrix Mouse Gene 1.0 ST arrays	Glioblastoma one dataset
Szulzewsky et al.	2016	Human	-	B	Human samples	CD11b magnetic beads separation	RNAseq (Illumina HiSeq 1500)	Glioblastoma and controls 5 Datasets
Table legend
FCS	Facs sorting
B	Cd11b+ magnetic beads or Cd45 immunopanning
LCM	Laser microdissection
O	Others
Bold	Pathological condition tested
Microarray
RNA-Seq

## Sheet: Sub-table 2
Table 2 :Use of microglia-specific gene expression strategies after peripheral immune challenges
1st Author	Year	Species	Microglia source	Isolation Techniques	Isolation techniques	Transcriptome assessment	Immune Challenge
Chiu et al.	2013	Mouse	Adult Spinal cord	FCS	Cd11b+ magnetic beads separation	RNAseq (Illumina)	LPS O55:B55 E.Coli (Sigma) 5 mg/kg; i.p.	48h
Bennett et al.	2016	Mouse	Adult Brain, Tmem119+	FCS	Tmem119+	RNAseq (NextSeq Illumina)	LPS O55:B55 E.Coli (Sigma) 5 mg/kg; i.p.	24h
Gonzales-Penna et al.	2016	Mouse	Whole brains	B	Cd11b magnetic beads separation	RNAseq (Illumina HiSeq 2000)	BCG 10 mg (2.107 CFU); i.p.	7 days
Srinivasan et al.	2016	Mouse	Cortices + Hippocampi	FCS	Cd11b staining	RNAseq (Illumina HiSeq 2500)	LPS 0111:B4 E.Coli (Sigma) 10 mg/kg; i.p.	24h
Hirbec et al.	2017	Mouse	Cortices	FCS	GFP+ cells (using CX3CR1+/eGFP mice)	RNAseq (Illumina HiSeq 2500)	LPS O26:B6 E.Coli (Sigma) 4 mg/kg; i.p.	24h
