# Supplementary material for: Microglia Responses in Acute and Chronic Neurological Diseases: What Microglia-Specific Transcriptomic Studies Taught (and did Not Teach) Us
Source: Front Aging Neurosci. 2017 Jul 21;9:227. doi: 10.3389/fnagi.2017.00227 (PMC5519576; doi:10.3389/fnagi.2017.00227)
Supplement: Supplementary file 2 [file Table_2.xlsx]

## Sheet: GO-Panther
Table S1: Go-terms significantly overrepresented in the different DEG lists (reanalysed with the GO-slim-Panther tool, Mi_2017)
Injuries
SCI Hemisection _Noristani et al., 2017			SCI Full-Transection _Noristani et al., 2017
72 h	1 week	2 weeks	72 h	1 week	2 weeks
Oxidative phosphorylation	Locomotion	Response to interferon-gamma	Oxidative phosphorylation	Translation	Locomotion
Generation of precursor metabolites and energy	Cytokine-mediated signaling pathway	Immune response	Generation of precursor metabolites and energy	Macrophage activation	Translation
DNA recombination	Cellular defense response	Locomotion	DNA recombination	Cell adhesion	Cytokine-mediated signaling pathway
DNA metabolic process	Cellular component movement	Macrophage activation	DNA metabolic process	Proteolysis	Transmembrane receptor protein tyrosine kinase signaling pathway
DNA replication	Proteolysis	Cytokine-mediated signaling pathway	DNA replication		Response to external stimulus
Purine nucleobase metabolic process	Immune response	Cell adhesion	Chromosome segregation		MAPK cascade
Chromosome segregation		Cellular component movement	Purine nucleobase metabolic process		Cellular component movement
Translation			Translation		Cell adhesion
Respiratory electron transport chain			Respiratory electron transport chain
DNA repair			Mitosis
Mitosis			Cell cycle
Cell cycle			Organelle organization
Synaptic transmission			Catabolic process
Cell-cell signaling
Cellular component biogenesis
Organelle organization
Amyotrophic Lateral Sclerosis				Alzheimer Disease
SODG93A_Chiu et al., 2013			SODG93A__Noristani et al., 2015	APP/PS1_Orre et al., 2014
65 Days	100 Days	End stage	90 Days	15-18 months old
Oxidative phosphorylation	Chromatin assembly	Locomotion	Locomotion	Locomotion
Cellular component biogenesis	Organelle organization	Translation	Cellular defense response	Cell proliferation
	Regulation of gene expression, epigenetic	Cellular component movement	MAPK cascade	Transmembrane receptor protein tyrosine kinase signaling pathway
	Chromosome segregation	Cell adhesion	Cell-cell signaling	Cytokine-mediated signaling pathway
	Sulfur compound metabolic process	Catabolic process		MAPK cascade
	Locomotion	Organelle organization		Cellular component movement
	Chromatin organization			Regulation of phosphate metabolic process
	DNA metabolic process			Cell adhesion
	Cellular component movement			Immune response
	Mitosis
	Cell cycle
	Catabolic process
Gliomas
Gliomas_Szulzewsky et al., 2015	Gliomas_Szulzewsky et al., 2016			Colour code :
Mice study	Human study			Immune/Inflammatory response
Cell killing	Chromosome segregation			Cell movement / Cell Adhesion
Response to interferon-gamma	DNA replication			ATP mediated processes
Immune response	DNA metabolic process			DNA/RNA related processes
Cytokine-mediated signaling pathway	Mitosis			Protein related processes
Locomotion	Cell cycle			Cell proliferation / Cell death
Cell-cell adhesion	Cell-cell adhesion			Signaling pathways
Cell adhesion	Cell adhesion
Response to external stimulus	Cellular component movement
MAPK cascade
Peripheral immune challenge
LPS_Holtman et al., 2015		LPS_Bennett et al., 2016
3h		24h
Regulation of sequence-specific DNA binding transcription factor activity		Locomotion
Regulation of molecular function		Cytokine-mediated signaling pathway
Response to interferon-gamma		Response to external stimulus
Regulation of gene expression, epigenetic		Cellular component movement
I-kappaB kinase/NF-kappaB cascade		Immune response
Locomotion
Cytokine-mediated signaling pathway
MAPK cascade
Chromatin organization
Apoptotic process
Cell death
Regulation of nucleobase-containing compound metabolic process
Catabolic process
Response to stress
Cell cycle

## Sheet: GO-Literrature
Table S2: Go-terms significantly overrepresented in the different DEG lists (as indicated in the originals manuscript)
Pain
Pain_Jeong et al., 2016
1 Day	7 Days	1 & 7 Days
Chemotaxis	Type I IFN-mediated signaling pathway	Il6 production
C5a signaling pathway	Cellular response to calcium ion	Chemokine biosynthetic process
Succinate metabolic process	Cytokine-mediated signaling pathway	JNK cascade
Cytokine-mediated signaling pathway	Cellular response to IFNg	NF-kb transcription factor activity
Mitotic cell cycle	Phospholipid metabolic process	TNF production
Multiple sclerosis
EAE_Starassom et al., 2011			Cuprizone diet_Olah et al., 2012		EAE-Stage 3, Lewis et al., 2014
Acute phase	Chronic Phase	Both acute & chronic	5 weeks post cuprizone diet	2 weeks post-cuprizone withdrawal	Protein ubiquitination
Cell-To-Cell Signaling and Interaction	Antigen Presentation	Inflammatory Response	Cell cycle	Endocytosis	Antigen presentation
Tissue Development	Cellular Movement	Cell-To-Cell Signaling and Interaction	Ubiquitin mediated proteolysis	Chemokine signaling pathway	Mitochondrial dysfunction
Cellular Movement	Immune Cell Trafficking	Hematological System Development and Function	p53 signaling pathway	Calcium signaling pathway	Oxidative phosphorylation
Hematological System Development and Function	Cardiovascular System Development and Function	Connective Tissue Disorders		Toll-like receptor signaling pathway
Immune Cell Trafficking	Tissue Morphology	Inflammatory Disease		ECM- receptor interaction
Peripheral immune challenge		Colour code :
LPS challenge_Chiu et al., 2013	BcG challenge_Gonzales-Penna et al., 2016	Immune/Inflammatory response
48h	7 Days	Cell movement / Cell Adhesion
Cell Cycle	Defense response	ATP mediated processes
DNA metabolic processes	Chemotaxis	DNA/RNA related processes
DNA replication	Carbohydrate binding	Protein related processes
Nucleotide biosynthetic processes	Peptidase inhibitor activity	Cell proliferation / Cell death
Chromosome	Immune effector process	Signaling pathways
		Others
